# Supplementary material
Source: HighWire-hosted journal article supplement (http://d2538ggaoe6cji.cloudfront.net/highwire/filestream/20087/field_highwire_adjunct_files/0/072975-1.pdf)
Supplement: 072975-1.pdf [file 072975-1.pdf]

SUPPLEMENTAL FIGURES AND TABLES

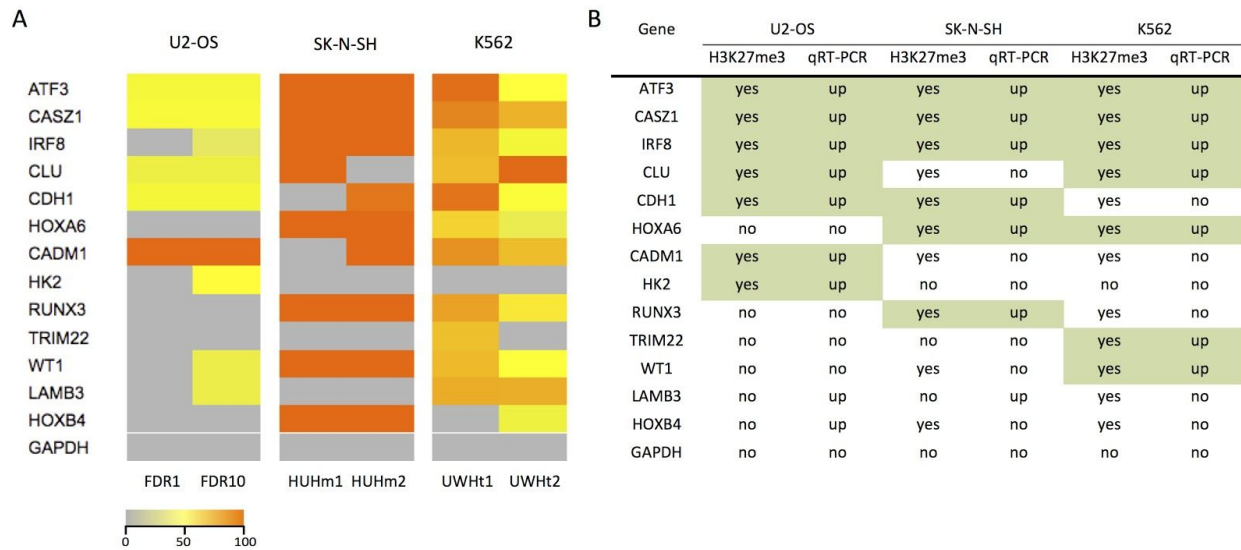

**Figure S1.** H3K27me3 enrichment at known Polycomb-regulated genes in U-2 OS, SK-N-SH, and K562. (A) H3K27me3 ChIP enrichment data for 13 known Polycomb-repressed genes and one active housekeeping-gene control. For each gene, we determined the highest ChIP signal within 1000 bp upstream of the TSS and along the gene body. These values were scaled to the maximum value within each set of data displayed here. For SK-N-SH and K562, we assessed the level of histone H3K27 trimethylation using shared and public data. SK-N-SH signals were determined using the Homer algorithm<sup>1</sup> for two replicate experiments (HUHm1 and HUHm2). SK-N-SH data was provided by B. Bernstein prior to submission to UCSC ENCODE database. K562 signals were determined using the Hotspots algorithm (UCSC Accession wgEncodeEH000923) for two replicate experiments (UWht1 and UWht2). For U-2 OS Hotspot values, FDR1 = a false discovery rate of 1%, FDR10 = a false discovery rate of 10%. (B) Comparison of H3K27me3 and response to PcTF expression (determined by qRT-PCR, see Fig. 1b) for each gene shown in A.

## Overlap with truncated $\Delta$ PcTF

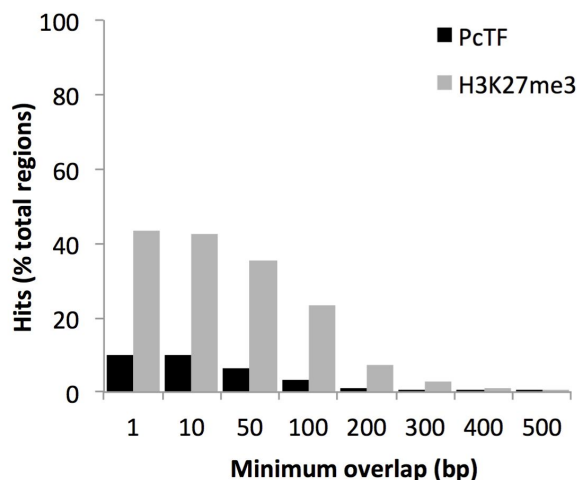

Figure S2. Overlap of PcTF and H3K27me3 ChIP-seq signal regions (Hotspots, FDR 1%) with signal regions from CHIP-seq for a cell line that expresses a truncated version of PcTF that lacks the PCD (histone-binding domain). The doxycycline-inducible delta-PcTF cell line was generated as described for PcTF. CHIP data was obtained as described for PcTF.

| Gene Symbol | Transcript   | Forward Primer            | Reverse Primer             | LNA probe |
|-------------|--------------|---------------------------|----------------------------|-----------|
| ATF3        | NM_001030287 | aaggattttcagcaccttgc      | gatggcagaagcactcacttc      | 13        |
| CADM1       | NM_001098517 | gcgcatgtcattagcatctc      | ctcggcagcactacactcg        | 16        |
| CASZ1       | NM_001079843 | caacaacaacctggtgaacg      | ttcggaaactcgcagtgtct       | 54        |
| CDH1        | NM_004360    | ggtctgtcatggaaggtgct      | gatggcggcattgttaggt        | 5         |
| CLU         | NM_001831    | gggaccagacggtctcag        | cgctacttactccctgattggac    | 1         |
| HK2         | NM_000189    | tccttccctgaacctttcc       | cagatttcaagagacatgacattagc | 22        |
| HOXA6       | NM_024014    | gcagcggatgaactcctg        | ggttgaagtggaactcctctc      | 47        |
| HOXB4       | NM_024015    | ctggatgcgcaaagttcac       | agcggttgtagtgaattcctt      | 62        |
| IRF8        | NM_002163    | gaggtggtccaggtcttcg       | cggccctggctgttatag         | 20        |
| LAMB3       | NM_001017402 | cccagtttgctttgctgtg       | gggcaaaacacaagaggaag       | 41        |
| RUNX3       | NM_004350    | ggcctctccatgccttct        | aggaggggaagaaactacaaggac   | 38        |
| TRIM22      | NM_006074    | tcactctgagaatttaactttcgtt | ggctggctccacaaatga         | 17        |
| WT1         | NM_001198551 | agggtctgaggattgtgc        | cgaaggtgaccgtgctgta        | 37        |

Table S1. Primers and probes were designed to analyze, via real time quantitative PCR, the expression of genes that were predicted as targets of the synthetic chromatin protein. The HUGO Gene Symbol and RNA transcript ID is shown for each gene. The Roche Assay Design Center tool (<http://www.roche-applied-science.com/sis/rtPCR/upl/index.jsp?id=UP030000>) was used to choose each forward primer, reverse primer, and Locked nucleic acid (LNA) probe from the Roche

Universal Probe Library (UPL).

#### SUPPLEMENTAL REFERENCES

1. Heinz S, Benner C, Spann N, Bertolino E, Lin YC, Laslo P, Cheng JX, Murre C, Singh H, Glass CK. (2010) Simple combinations of lineage-determining transcription factors prime cis-regulatory elements required for macrophage and B cell identities. *Mol Cell*. 38:576-89.
